# Supplementary material
Source: MDPI journal article supplement (https://www.mdpi.com/2076-0760/2/4/318)
Supplement: s1 [file s1]

*Correction*

**Correction: Bouvet F., et al., Debt Contagion in Europe: A Panel-Vector Autoregressive (VAR) Analysis. *Soc. Sci.* 2013, 2, 318–340**

**Martin J. Bull**

Editor-in-Chief of Social Sciences, University of Salford, Crescent House, The Crescent, Salford, Manchester, M5 4WT, UK; E-Mail: m.j.bull@salford.ac.uk

*Received: 27 March 2014 / Published: 27 March 2014*

---

It has come to our attention that due to an error in producing the PDF version of the paper [1], doi:10.3390/socsci2040318, website: <http://www.mdpi.com/2076-0760/2/4/318>, some of the figures are displayed incorrectly.

The correct PDF version is available at <http://www.mdpi.com/2076-0760/3/2/193>.

**References**

1. Bouvet, Florence, Ryan Brady, and Sharmila King. “Debt Contagion in Europe: A Panel-Vector Autoregressive (VAR) Analysis.” *Social Sciences* 2, no. 4 (2013): 318–40.

© 2014 by the author; licensee MDPI, Basel, Switzerland. This article is an open access article distributed under the terms and conditions of the Creative Commons Attribution license (<http://creativecommons.org/licenses/by/3.0/>).
